# Supplementary material for: Patterns of change in treatment, response, and outcome in patients with follicular lymphoma over the last four decades: a single-center experience
Source: PubMed Central journal article supplement (PMC7058022; doi:10.1038/s41408-020-0299-0), 2020-03-05
Supplement: 41408_2020_299_MOESM1_ESM.pdf [file 41408_2020_299_MOESM1_ESM.pdf]

**Decade 1 (1980–1989)**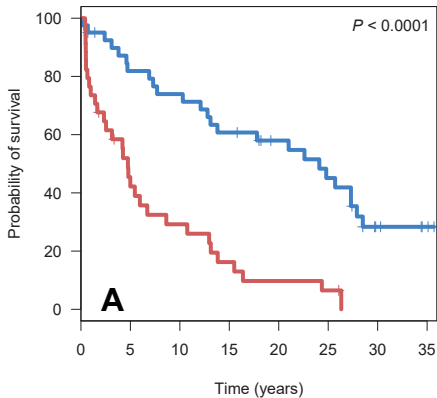

| No. at risk: | 0  | 5  | 10 | 15 | 20 | 25 | 30 | 35 |
|--------------|----|----|----|----|----|----|----|----|
| No-POD24     | 41 | 31 | 28 | 23 | 18 | 14 | 5  | 2  |
| POD24        | 34 | 13 | 9  | 5  | 3  | 2  | 0  | 0  |

**Decade 2 (1990–1999)**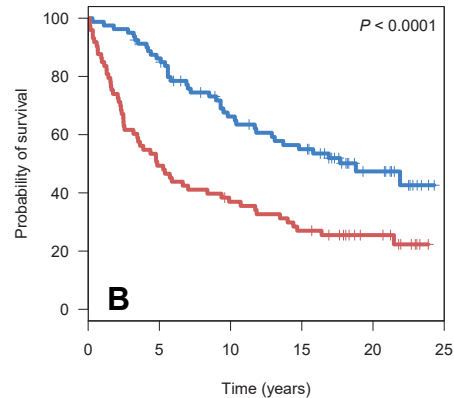

| No. at risk: | 0  | 5  | 10 | 15 | 20 | 25 |
|--------------|----|----|----|----|----|----|
| No-POD24     | 80 | 68 | 48 | 39 | 16 | 0  |
| POD24        | 73 | 36 | 26 | 19 | 10 | 0  |

**Decade 3 (2000–2009)**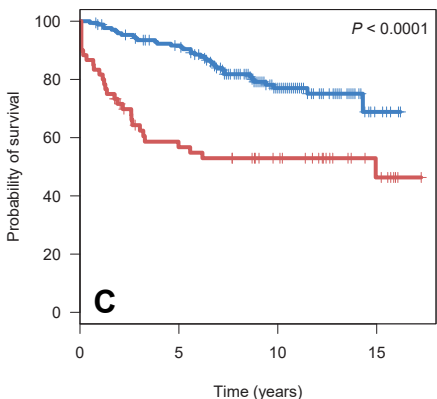

| No. at risk: | 0   | 5   | 10 | 15 |
|--------------|-----|-----|----|----|
| No-POD24     | 172 | 148 | 67 | 6  |
| POD24        | 60  | 30  | 21 | 7  |

**Decade 4 (2010–2017)**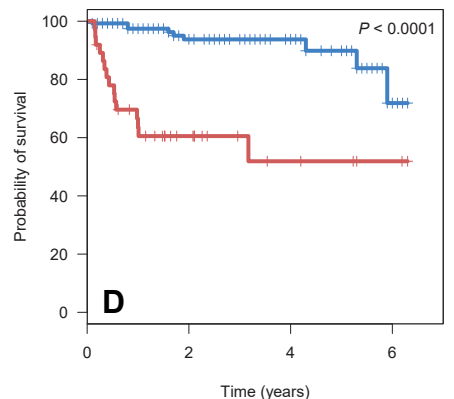

| No. at risk: | 0   | 2  | 4  | 6 |
|--------------|-----|----|----|---|
| No-POD24     | 133 | 74 | 30 | 4 |
| POD24        | 37  | 13 | 5  | 2 |

**Decade 1 (1980–1989)**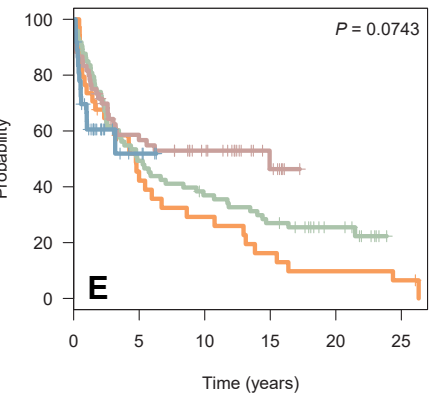

| No. at risk: | 0  | 5  | 10 | 15 | 20 | 25 |
|--------------|----|----|----|----|----|----|
| 34           | 34 | 13 | 9  | 5  | 3  | 2  |
| 73           | 73 | 36 | 26 | 19 | 10 | 0  |
| 60           | 60 | 30 | 21 | 7  | 0  | 0  |
| 37           | 37 | 4  | 0  | 0  | 0  | 0  |

**Supplementary Figure 1.** Survival from an event-defining timepoint (the time of progression for POD24 patients, or 2 years of follow-up for non-POD24 patients), according to the decade of diagnosis (A through D), and only for POD24 patients (E).
