# Supplementary material for: Patterns of change in treatment, response, and outcome in patients with follicular lymphoma over the last four decades: a single-center experience
Source: PubMed Central journal article supplement (PMC7058022; doi:10.1038/s41408-020-0299-0), 2020-03-05
Supplement: 41408_2020_299_MOESM2_ESM.pdf [file 41408_2020_299_MOESM2_ESM.pdf]

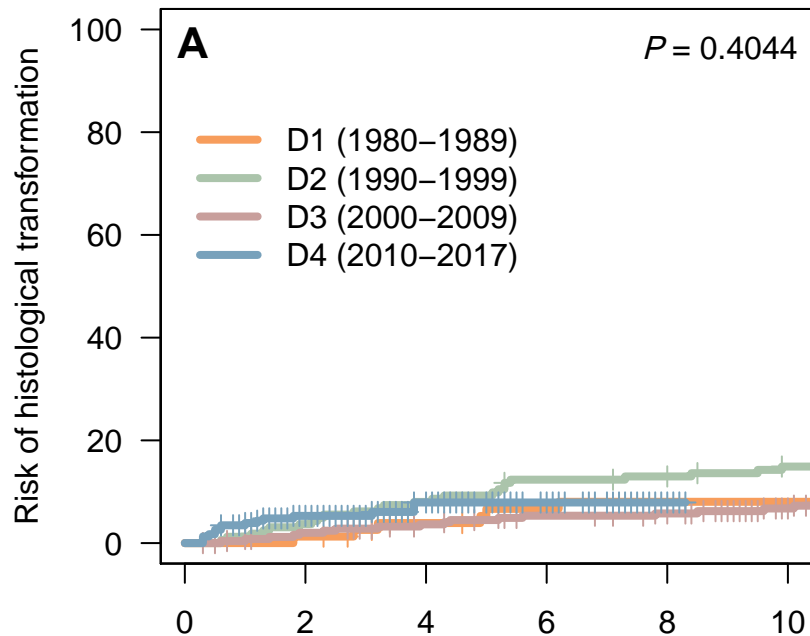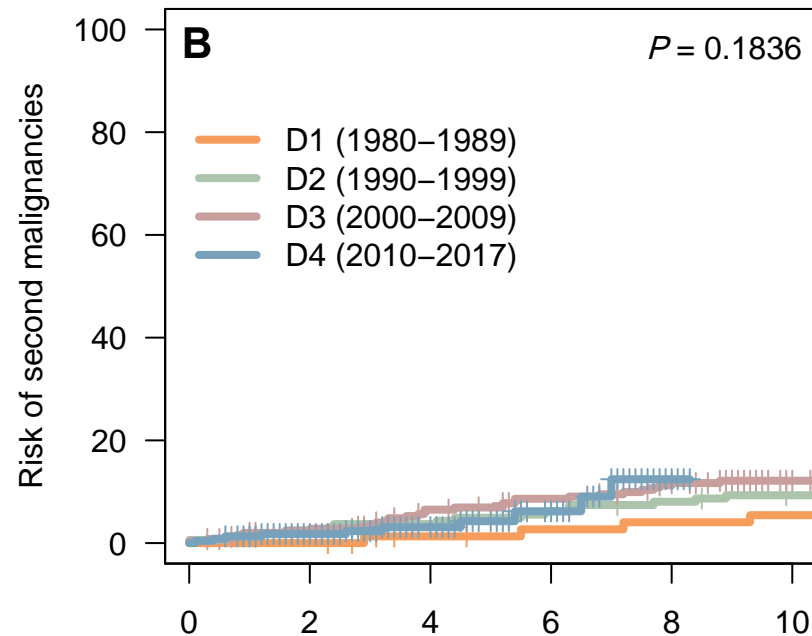

Time (years)

Time (years)

**No. at risk:**

**No. at risk:**

|                |     |     |     |     |     |     |
|----------------|-----|-----|-----|-----|-----|-----|
| D1 (1980–1989) | 79  | 67  | 55  | 44  | 37  | 33  |
| D2 (1990–1999) | 163 | 143 | 124 | 106 | 92  | 82  |
| D3 (2000–2009) | 254 | 227 | 205 | 185 | 173 | 131 |
| D4 (2010–2017) | 231 | 175 | 85  | 35  | 5   | 0   |

|                |     |     |     |     |     |     |
|----------------|-----|-----|-----|-----|-----|-----|
| D1 (1980–1989) | 79  | 68  | 58  | 48  | 42  | 38  |
| D2 (1990–1999) | 163 | 144 | 123 | 104 | 89  | 82  |
| D3 (2000–2009) | 254 | 229 | 200 | 178 | 165 | 125 |
| D4 (2010–2017) | 231 | 180 | 87  | 34  | 5   | 0   |

**Supplementary Figure 2.** Risk of histological transformation (A) and of second malignancies (B) with a follow-up limited to 10 years, according to the decade of diagnosis.
