# Supplementary material for: Patterns of change in treatment, response, and outcome in patients with follicular lymphoma over the last four decades: a single-center experience
Source: PubMed Central journal article supplement (PMC7058022; doi:10.1038/s41408-020-0299-0), 2020-03-05
Supplement: 41408_2020_299_MOESM3_ESM.pdf [file 41408_2020_299_MOESM3_ESM.pdf]

**Males**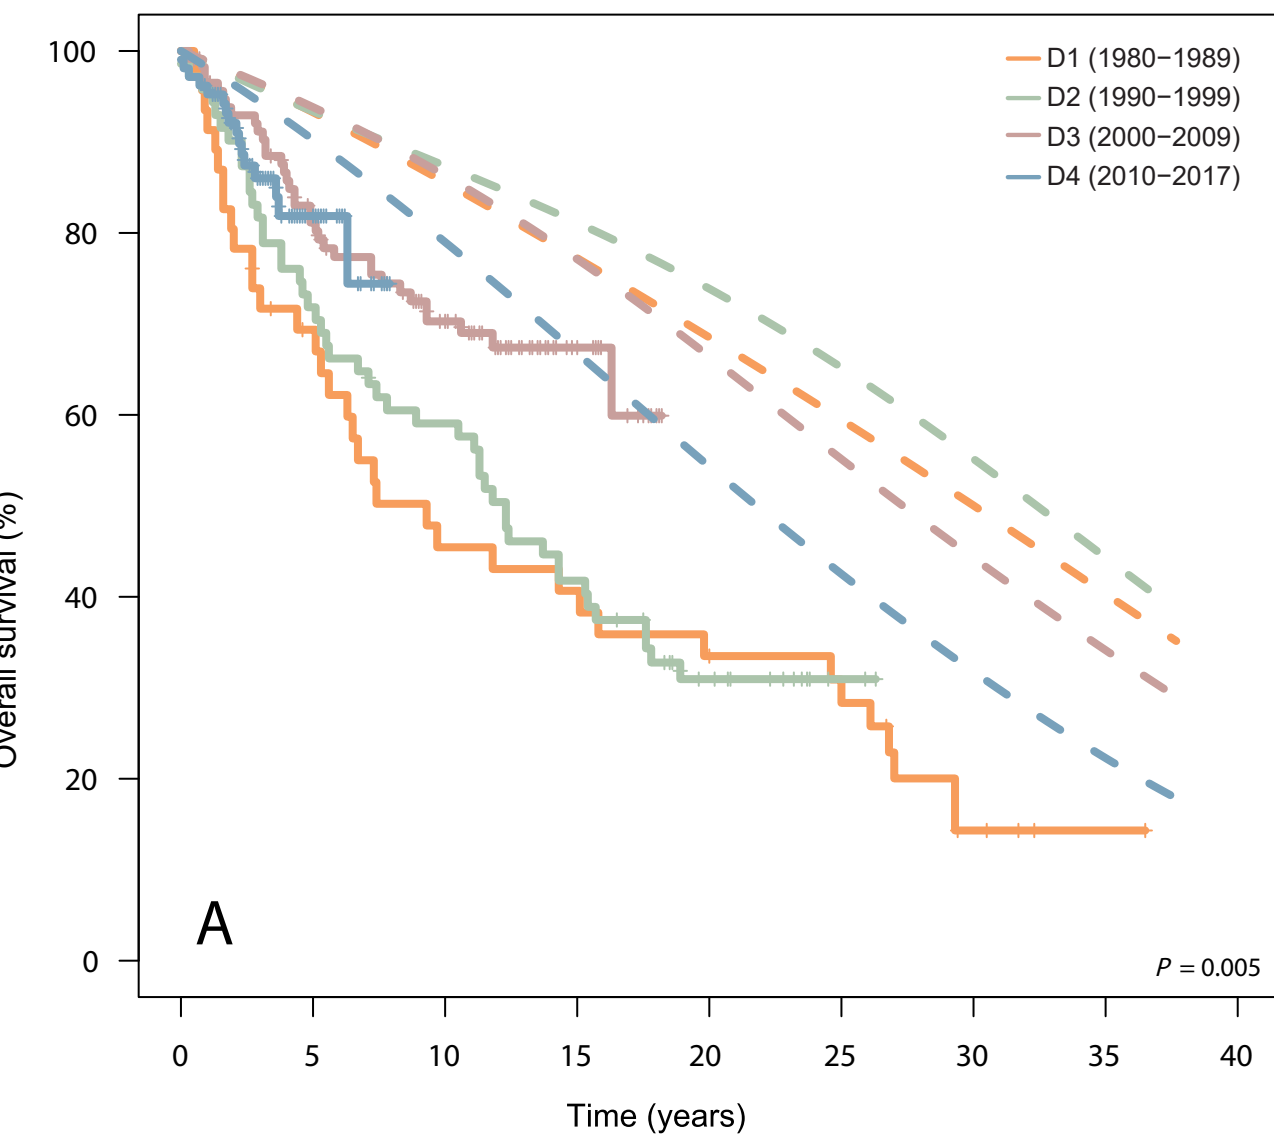

No. at risk:

|     |    |    |    |    |    |   |   |   |
|-----|----|----|----|----|----|---|---|---|
| 46  | 29 | 19 | 17 | 14 | 12 | 4 | 1 | 0 |
| 71  | 51 | 41 | 29 | 14 | 2  | 0 |   |   |
| 116 | 87 | 59 | 18 | 0  | 0  |   |   |   |
| 105 | 27 | 0  | 0  |    |    |   |   |   |

**Females**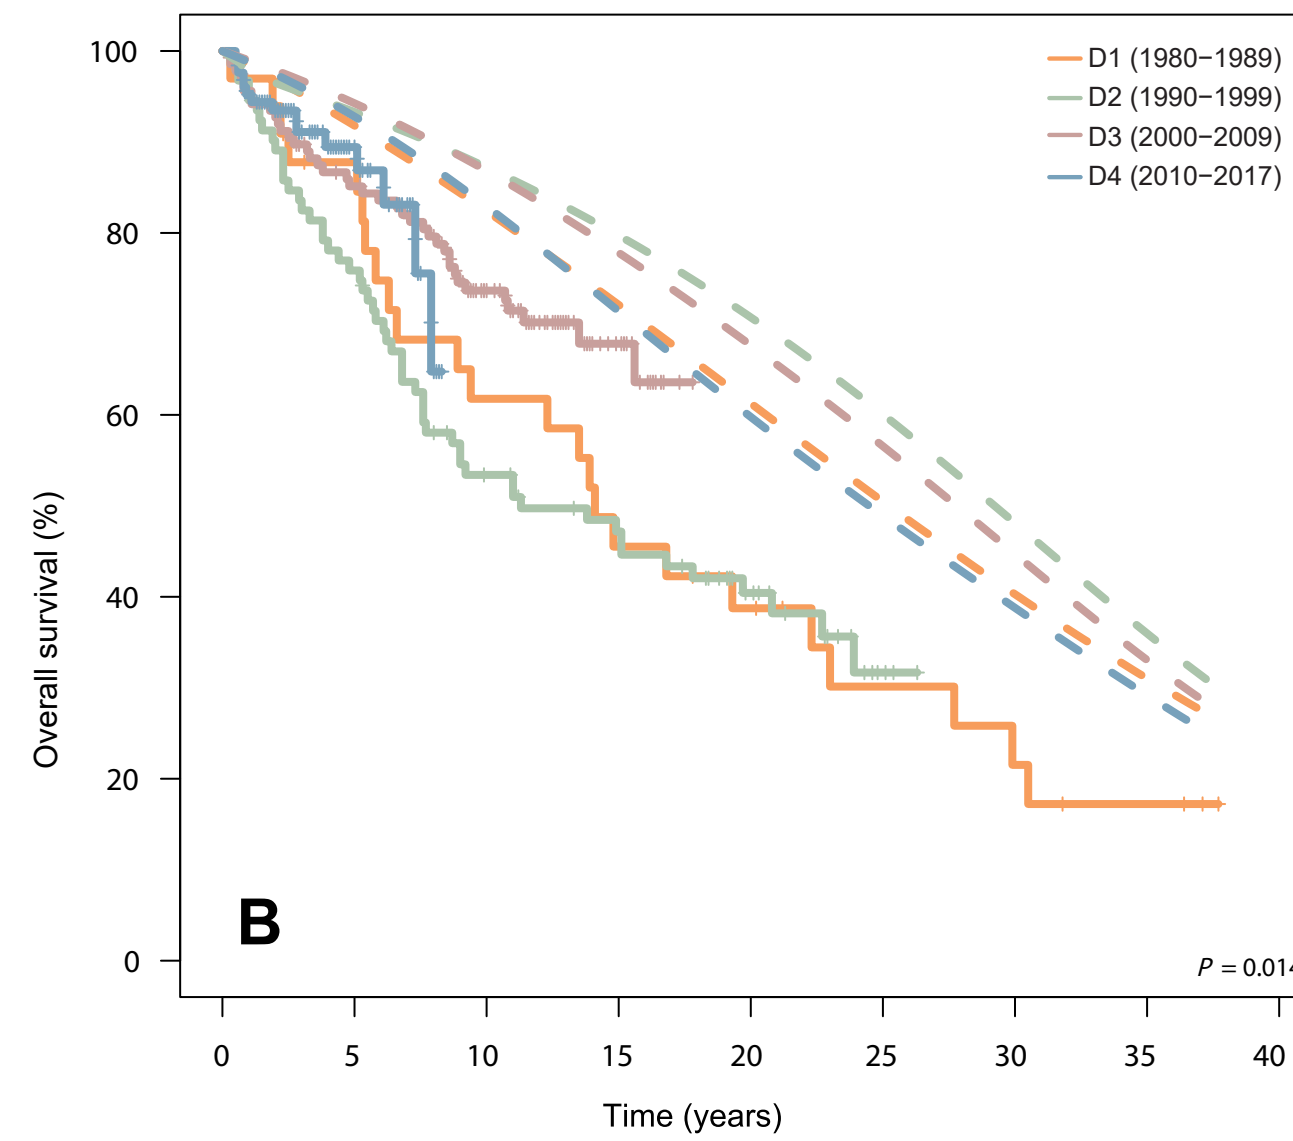

No. at risk:

|     |     |    |    |    |     |   |  |  |
|-----|-----|----|----|----|-----|---|--|--|
| 33  | 27  | 19 | 14 | 11 | 7   | 5 |  |  |
| 92  | 69  | 45 | 37 | 23 | 444 | 0 |  |  |
| 138 | 110 | 74 | 21 | 0  | 0   |   |  |  |
| 126 | 36  | 0  | 0  |    |     |   |  |  |

**Supplementary Figure 3.** Comparison of observed (solid line) versus expected (dashed line) OS, according to the decade of diagnosis. A: male patients only; B: female patients only; C: patients younger than 50 years; D: patients between 50 and 69 years; and E: patients of 70 years or older.

**<50 years**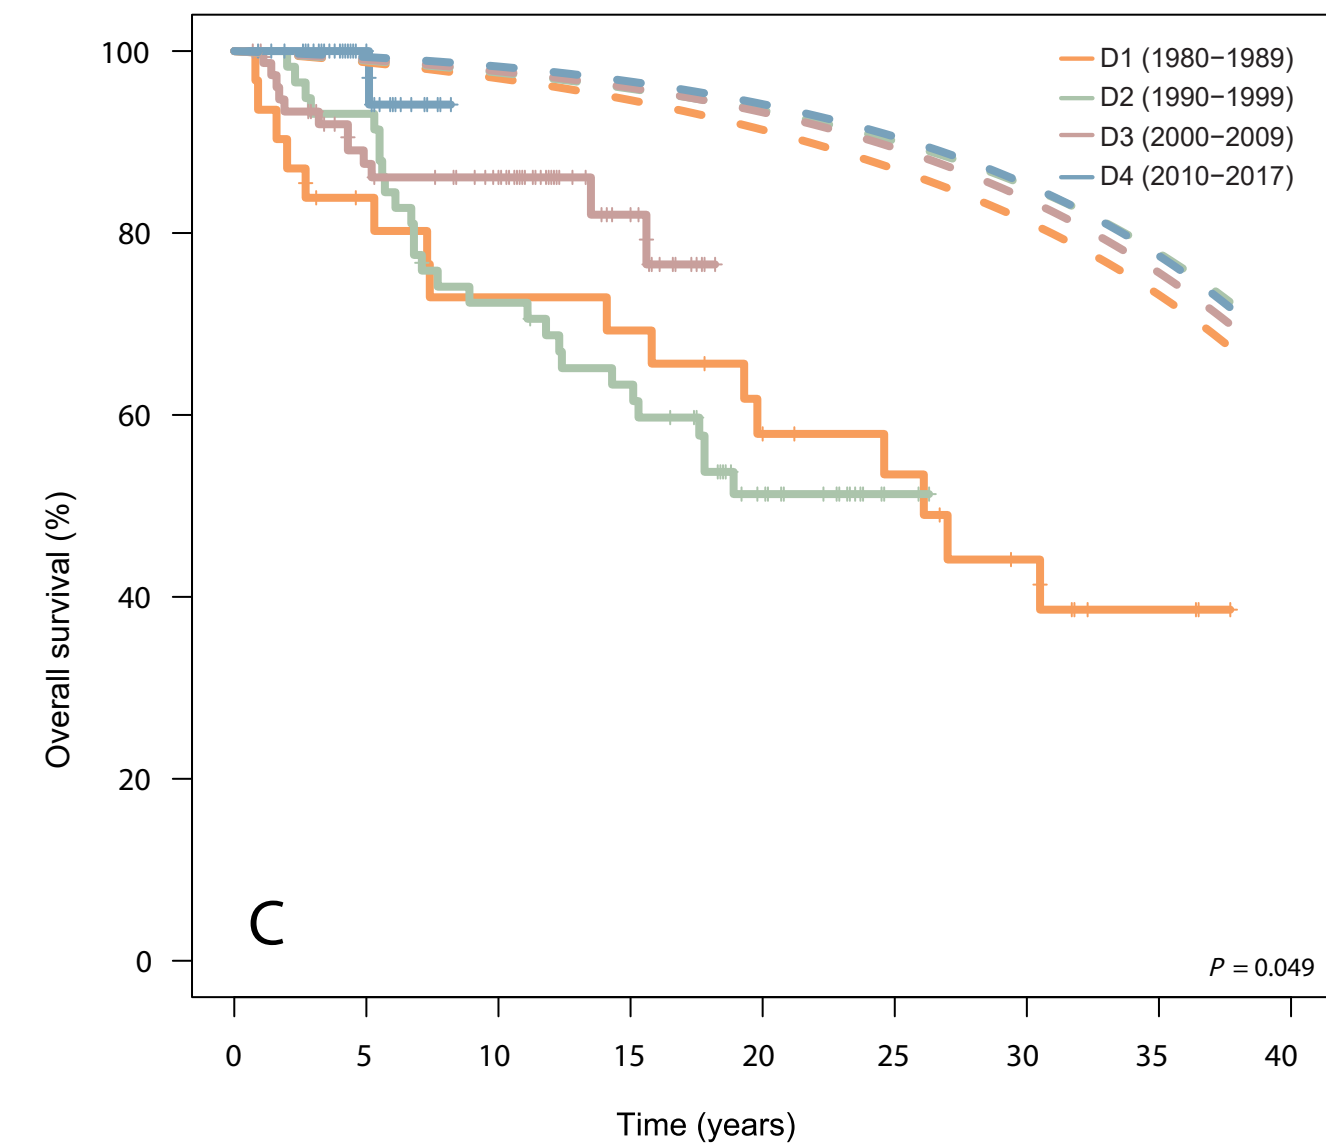

No. at risk:

|    |    |    |    |    |    |   |   |   |
|----|----|----|----|----|----|---|---|---|
| 31 | 23 | 20 | 19 | 15 | 12 | 8 | 3 | 0 |
| 58 | 54 | 41 | 35 | 19 | 4  | 0 |   |   |
| 78 | 59 | 48 | 17 | 0  | 0  | 0 |   |   |
| 47 | 18 | 0  | 0  |    |    |   |   |   |

**50-69 years**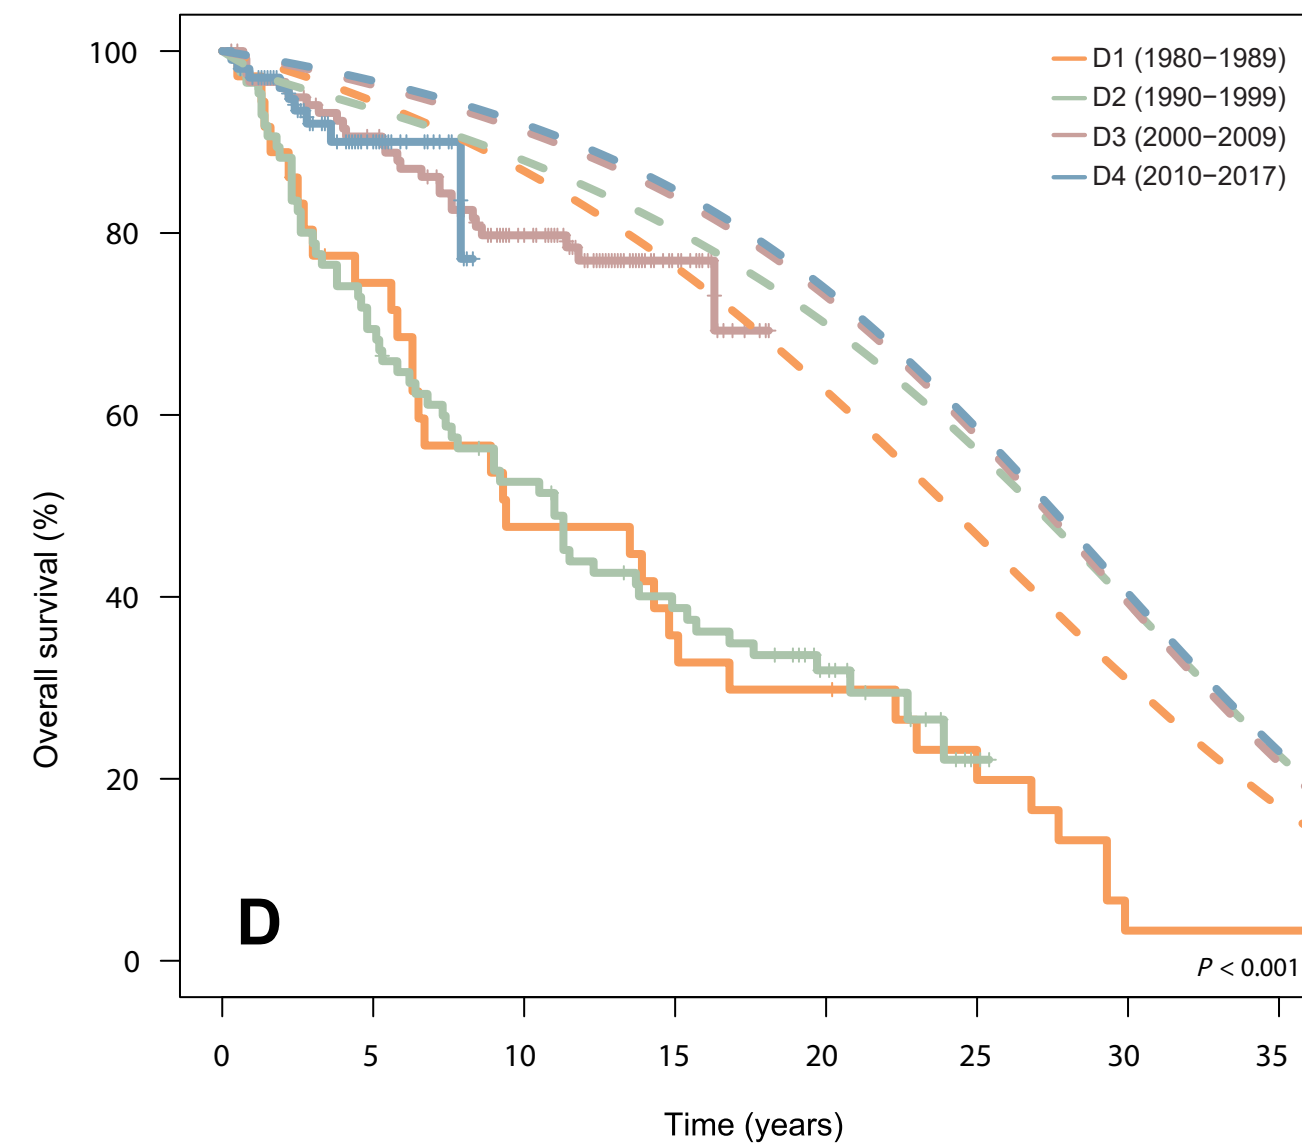

No. at risk:

|     |     |    |    |    |   |   |   |   |
|-----|-----|----|----|----|---|---|---|---|
| 36  | 25  | 16 | 12 | 10 | 7 | 1 | 1 | 1 |
| 86  | 59  | 43 | 30 | 18 | 2 | 0 | 0 | 0 |
| 120 | 104 | 73 | 21 | 0  | 0 | 0 | 0 | 0 |
| 103 | 32  | 0  | 0  |    |   |   |   |   |

**>70 years**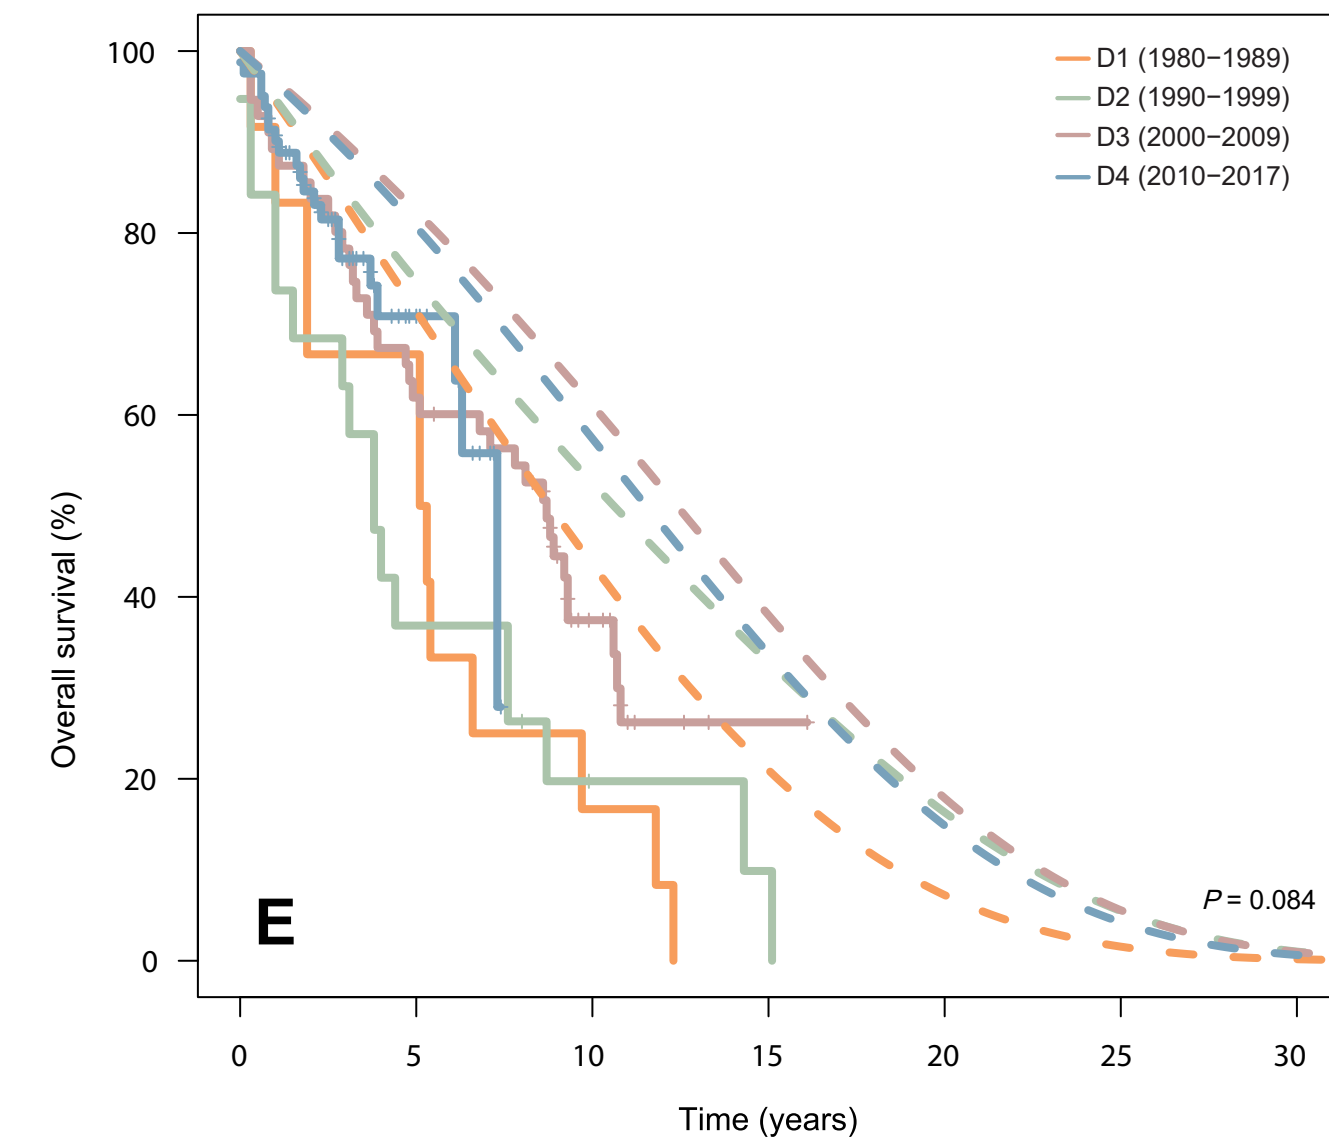

No. at risk:

|    |    |    |   |   |   |   |   |   |
|----|----|----|---|---|---|---|---|---|
| 12 | 8  | 2  |   |   |   |   |   |   |
| 19 | 7  | 2  |   |   |   |   |   |   |
| 56 | 34 | 12 | 1 | 0 | 0 | 0 | 0 | 0 |
| 81 | 13 | 0  | 0 |   |   |   |   |   |
