# Supplementary material for: Patterns of change in treatment, response, and outcome in patients with follicular lymphoma over the last four decades: a single-center experience
Source: PubMed Central journal article supplement (PMC7058022; doi:10.1038/s41408-020-0299-0), 2020-03-05
Supplement: 41408_2020_299_MOESM4_ESM.pdf [file 41408_2020_299_MOESM4_ESM.pdf]

## SUPPLEMENTARY MATERIAL

**Supplementary Table 1.** Initial treatment strategies.

| Treatment                       | Entire cohort<br>(N=727) | Decade 1<br>(1980-1989)<br>(N=79) | Decade 2<br>(1990-1999)<br>(N=163) | Decade 3<br>(2000-2009)<br>(N=254) | Decade 4<br>(2010-2017)<br>(N=231) |
|---------------------------------|--------------------------|-----------------------------------|------------------------------------|------------------------------------|------------------------------------|
| Watchful waiting (%)            | 110 (15)                 | 2 (3)                             | 5 (3)                              | 34 (13)                            | 69 (30)                            |
| R-CHOP (%)                      | 174 (24)                 | 0                                 | 0                                  | <b>92 (36)</b>                     | <b>82 (35)</b>                     |
| R-CVP (%)                       | 43 (6)                   | 0                                 | 0                                  | 25 (10)                            | 18 (8)                             |
| Other R-containing regimens (%) | 45 (6)                   | 0                                 | 0                                  | 25 (10)                            | 20 (9)                             |
| Single-agent rituximab (%)      | 48 (7)                   | 0                                 | 0                                  | 8 (3)                              | 40 (17)                            |
| CHOP-like (%)                   | 199 (27)                 | <b>50 (63)</b>                    | <b>122 (75)</b>                    | 27 (11)                            | 0                                  |
| Fludarabine-based (%)           | 34 (5)                   | 0                                 | 3 (2)                              | 31 (12)                            | 0                                  |
| Other treatments/unknown (%)    | 74 (10)                  | 27 (34)                           | 33 (20)                            | 12 (5)                             | 2 (1)                              |

Most used treatment modality in each decade is highlighted in bold.

CVP, cyclophosphamide, vincristine, and prednisone; CHOP, cyclophosphamide, doxorubicin, vincristine, and prednisone; R, rituximab.
