# Supplementary material for: Patterns of change in treatment, response, and outcome in patients with follicular lymphoma over the last four decades: a single-center experience
Source: PubMed Central journal article supplement (PMC7058022; doi:10.1038/s41408-020-0299-0), 2020-03-05
Supplement: 41408_2020_299_MOESM5_ESM.pdf [file 41408_2020_299_MOESM5_ESM.pdf]

**Supplementary Table 2. Second-line treatment strategies**

| <b>Second-line treatment</b>         |   | <b>1980-1989</b> | <b>1990-1999</b> | <b>2000-2009</b> | <b>2010-2017</b> | <b>Total</b> |
|--------------------------------------|---|------------------|------------------|------------------|------------------|--------------|
| <b>No treatment</b>                  | n | 2                | 2                | 6                | 5                | 15           |
|                                      | % | 4%               | 2%               | 6%               | 10%              | 4%           |
| <b>R-CHOP/R-CVP</b>                  | n | 1                | 4                | 15               | 5                | 25           |
|                                      | % | 2%               | 3%               | 14%              | 10%              | 7%           |
| <b>Single-agent rituximab</b>        | n | 3                | 8                | 25               | 2                | 38           |
|                                      | % | 5%               | 6%               | 23%              | 4%               | 11%          |
| <b>Benda/Fluda-based (+/- R)</b>     | n | 1                | 34               | 19               | 15               | 69           |
|                                      | % | 2%               | 26%              | 17%              | 29%              | 20%          |
| <b>Other chemo regimens</b>          | n | 25               | 40               | 17               | 16               | 98           |
|                                      | % | 45%              | 31%              | 16%              | 31%              | 28%          |
| <b>Chlorambucil and other agents</b> | n | 23               | 15               | 1                | 0                | 39           |
|                                      | % | 41%              | 12%              | 1%               | 0%               | 11%          |
| <b>ASCT</b>                          | n | 1                | 23               | 22               | 7                | 53           |
|                                      | % | 2%               | 18%              | 20%              | 14%              | 15%          |
| <b>Allo-SCT</b>                      | n | 0                | 3                | 4                | 1                | 8            |
|                                      | % | 0%               | 2%               | 4%               | 2%               | 2%           |

CVP, cyclophosphamide, vincristine, and prednisone; CHOP, cyclophosphamide, doxorubicin, vincristine, and prednisone; R, rituximab; Benda, bendamustine; Fluda, fludarabine; chemo, chemotherapy; ASCT, autologous stem cell transplantation; Allo-SCT, allogeneic stem cell transplantation.
