# Supplementary material for: Patterns of change in treatment, response, and outcome in patients with follicular lymphoma over the last four decades: a single-center experience
Source: PubMed Central journal article supplement (PMC7058022; doi:10.1038/s41408-020-0299-0), 2020-03-05
Supplement: 41408_2020_299_MOESM6_ESM.pdf [file 41408_2020_299_MOESM6_ESM.pdf]

**Supplementary Table 3. Third-line treatment strategies**

| Third-line treatment          |   | 1980-1989 | 1990-1999 | 2000-2009 | 2010-2017 | Total |
|-------------------------------|---|-----------|-----------|-----------|-----------|-------|
| No treatment                  | n | 0         | 1         | 4         | 0         | 5     |
|                               | % | 0%        | 1%        | 6%        | 0%        | 3%    |
| R-CHOP/R-CVP                  | n | 1         | 7         | 6         | 0         | 14    |
|                               | % | 3%        | 9%        | 10%       | 0%        | 7%    |
| Single-agent rituximab        | n | 2         | 6         | 8         | 1         | 17    |
|                               | % | 6%        | 7%        | 13%       | 7%        | 9%    |
| Benda/Fluda-based (+/- R)     | n | 1         | 15        | 9         | 2         | 27    |
|                               | % | 3%        | 18%       | 15%       | 13%       | 14%   |
| Other chemo regimens          | n | 18        | 30        | 16        | 12        | 76    |
|                               | % | 53%       | 37%       | 26%       | 80%       | 39%   |
| Chlorambucil and other agents | n | 8         | 1         | 0         | 0         | 9     |
|                               | % | 24%       | 1%        | 0%        | 0%        | 5%    |
| ASCT                          | n | 4         | 18        | 11        | 0         | 33    |
|                               | % | 12%       | 22%       | 18%       | 0%        | 17%   |
| Allo-SCT                      | n | 0         | 4         | 8         | 0         | 12    |
|                               | % | 0%        | 5%        | 13%       | 0%        | 6%    |

CVP, cyclophosphamide, vincristine, and prednisone; CHOP, cyclophosphamide, doxorubicin, vincristine, and prednisone; R, rituximab; Benda, bendamustine; Fluda, fludarabine; chemo, chemotherapy; ASCT, autologous stem cell transplantation; Allo-SCT, allogeneic stem cell transplantation.
