# Supplementary material for: Patterns of change in treatment, response, and outcome in patients with follicular lymphoma over the last four decades: a single-center experience
Source: PubMed Central journal article supplement (PMC7058022; doi:10.1038/s41408-020-0299-0), 2020-03-05
Supplement: 41408_2020_299_MOESM7_ESM.pdf [file 41408_2020_299_MOESM7_ESM.pdf]

**Supplementary Table 4.** 5- and 10-year survival (observed, expected, and relative survival ratio, RSR) for all patients, and according to the decade of diagnosis, sex, and age at diagnosis. RSR are color-coded within each row, red and green representing poorer and better RSR values, respectively.

|              |         | 5-y OS      |           |           |           |           |      |
|--------------|---------|-------------|-----------|-----------|-----------|-----------|------|
|              |         | All decades | 1980-1989 | 1990-1999 | 2000-2009 | 2010-2017 |      |
| All patients | Series  | 80.7        | 77.0      | 74.1      | 83.3      | 86.0      |      |
|              | Pop     | 93.0        | 92.7      | 93.3      | 94.1      | 91.6      |      |
|              | RSR     | 0.87        | 0.83      | 0.79      | 0.89      | 0.94      |      |
| Sex          | Male    | Series      | 77.0      | 69.4      | 71.8      | 81.1      | 81.9 |
|              |         | Pop         | 92.5      | 93.3      | 93.4      | 93.8      | 90.3 |
|              |         | RSR         | 0.83      | 0.74      | 0.77      | 0.86      | 0.91 |
|              | Female  | Series      | 84.0      | 87.8      | 75.9      | 85.1      | 89.4 |
|              |         | Pop         | 93.4      | 91.8      | 93.3      | 94.3      | 92.8 |
|              |         | RSR         | 0.90      | 0.96      | 0.81      | 0.90      | 0.96 |
| Age          | <50 y   | Series      | 91.0      | 83.9      | 93.1      | 87.6      | 94.1 |
|              |         | Pop         | 99.1      | 98.8      | 99.0      | 99.0      | 99.3 |
|              |         | RSR         | 0.92      | 0.85      | 0.94      | 0.88      | 0.95 |
|              | 50-69 y | Series      | 82.7      | 74.5      | 69.4      | 90.6      | 90.0 |
|              |         | Pop         | 95.6      | 94.5      | 93.6      | 96.3      | 96.7 |
|              |         | RSR         | 0.87      | 0.79      | 0.74      | 0.94      | 0.93 |
|              | 70+ y   | Series      | 61.3      | 66.7      | 36.8      | 61.9      | 70.9 |
|              |         | Pop         | 79.9      | 71.4      | 74.8      | 82.4      | 80.7 |
|              |         | RSR         | 0.77      | 0.93      | 0.49      | 0.75      | 0.88 |

|              |         | 10-y OS     |           |           |           |           |      |
|--------------|---------|-------------|-----------|-----------|-----------|-----------|------|
|              |         | All decades | 1980-1989 | 1990-1999 | 2000-2009 | 2010-2017 |      |
| All patients | Series  | 64.5        | 52.3      | 55.9      | 72.1      |           |      |
|              | Pop     | 84.8        | 84.3      | 87.3      | 86.6      | 81.2      |      |
|              | RSR     | 0.76        | 0.62      | 0.64      | 0.83      |           |      |
| Sex          | Male    | Series      | 63.0      | 45.4      | 59.1      | 70.3      |      |
|              |         | Pop         | 84.2      | 85.6      | 87.4      | 86.3      | 79.0 |
|              |         | RSR         | 0.75      | 0.53      | 0.68      | 0.81      |      |
|              | Female  | Series      | 65.8      | 61.8      | 53.4      | 73.7      |      |
|              |         | Pop         | 85.3      | 82.4      | 87.2      | 86.8      | 82.9 |
|              |         | RSR         | 0.77      | 0.75      | 0.61      | 0.85      |      |
| Age          | <50 y   | Series      | 80.2      | 72.9      | 72.3      | 86.1      |      |
|              |         | Pop         | 97.7      | 97.0      | 97.6      | 97.8      | 98.3 |
|              |         | RSR         | 0.82      | 0.75      | 0.74      | 0.88      |      |
|              | 50-69 y | Series      | 67.2      | 47.7      | 52.7      | 79.7      |      |
|              |         | Pop         | 90.2      | 86.8      | 88.0      | 91.2      | 92.0 |
|              |         | RSR         | 0.75      | 0.55      | 0.60      | 0.87      |      |
|              | 70+ y   | Series      | 31.5      | 16.7      | 19.7      | 37.4      |      |
|              |         | Pop         | 57.1      | 43.6      | 52.6      | 61.1      | 57.4 |
|              |         | RSR         | 0.55      | 0.38      | 0.37      | 0.61      |      |

y, year; OS, overall survival, Pop, population; RSR, relative survival risk. OS from the Series and the Population are expressed in %.
