# Supplementary material for: Patterns of change in treatment, response, and outcome in patients with follicular lymphoma over the last four decades: a single-center experience
Source: PubMed Central journal article supplement (PMC7058022; doi:10.1038/s41408-020-0299-0), 2020-03-05
Supplement: 41408_2020_299_MOESM8_ESM.pdf [file 41408_2020_299_MOESM8_ESM.pdf]

**Supplementary Table 5.** Cause-specific cumulative incidence of mortality, using competing risk of death, for all deceased patients.

|                                              | <b>Entire cohort (N=204)</b> | <b>Decade 1 (1980-1989) (N=36)</b> | <b>Decade 2 (1990-1999) (N=71)</b> | <b>Decade 3 (2000-2009) (N=66)</b> | <b>Decade 4 (2010-2017) (N=31)</b> | <b>P value</b> |
|----------------------------------------------|------------------------------|------------------------------------|------------------------------------|------------------------------------|------------------------------------|----------------|
| <b>Death due to progressive FL</b>           |                              |                                    |                                    |                                    |                                    | <0.0001        |
| 5-year risk, %                               | 11                           | 14                                 | 20                                 | 7                                  | 7                                  |                |
| 10-year risk, %                              | 19                           | 29                                 | 29                                 | 12                                 | -                                  |                |
| <b>Death due to complications of therapy</b> |                              |                                    |                                    |                                    |                                    | NS             |
| 5-year risk, %                               | 2                            | 1                                  | 1                                  | 4                                  | 2                                  |                |
| 10-year risk, %                              | 3                            | 1                                  | 3                                  | 4                                  | -                                  |                |
| <b>Death due to other neoplasms</b>          |                              |                                    |                                    |                                    |                                    | NS             |
| 5-year risk, %                               | 3                            | 1                                  | 2                                  | 4                                  | 2                                  |                |
| 10-year risk, %                              | 6                            | 4                                  | 6                                  | 7                                  | -                                  |                |

FL, follicular lymphoma.
